# Supplementary material for: To Wrap Or to Not Wrap Cucumbers?
Source: Frontiers journal article supplement (doi:10.3389/fsufs.2022.750199), 2022-06-30
Supplement: Table_1.XLSX [file Table_1.XLSX]

## Sheet: Content
	Sheet title	Description
	1. Notes	Goal, scope, assumptions, additional supporting info/notes
	2. Data	Data retrieved from literature to build the case study
	3. LCA flows	LCA processes from ecoinvent/meta analysis for the case study and calculations
	4. Break-even analysis	Calculated from (3) for different levels of food waste reduction

## Sheet: 1. Notes
	Goal:
	To assess the contribution of each stage in the life-cycle of cucumber production and distribution towards climate change.
	To assess the net climate change impact due to adding a plastic wrap (LDPE film) to the cucumbers
	Scope:
	Supply chain of cucumbers imported from Spain and sold by retailers in Switzerland
	Premises:
	Adding plastic film generates impacts due to plastic production and disposal, thus increasing climate change impact. However this plastic may reduce food losses/waste at retailer level, thus reducing the environmental impact due to food waste.
	System boundaries:
	Farm to point-of-sale, i.e. grower-to-grocer												Stages:	Scenario 1	Scenario 2
													Cultivation
													Primary packaging
													Secondary packaging
													Transportation
													Retail
													End-of-life food waste
													End-of-life plastic waste
	Functional unit:
	FU is 1000 kg of cucumbers sold at retail
	Scenario 1 = S1; Scenario 2 = S2
	Cultivation, secondary packaging, distribution and retail conditions are the same in both scenarios.
	Scenario 2 has in addition plastic production (LDPE, film)												Description	Scenario 1	Scenario 2
	Use phase at consumer is not included due to lack of data												Food waste at retail (%)	9.4	4.6
	Scenario 1 has 9.4% of food waste at retail												Cucumbers sold at retail (kg)	1000	1000
	Scenario 2 has 4.6% food waste at retail and waste due to plastic film (from all cucumbers).												Starting volume of cucumbers	1103.75	1048.22
	Assumptions:
	Cucumber are produced in Spain (ES) in greenhouses (passive)
	We do not account for local transport, we account only for international transport
	We do not account for transport from the agricultural field to the packaging industry.
	We account for transport from ES to CH (1200 km), where cucumbers are sold by retailers
	We do not account for transport between retail and disposal place, as these distances are quite small
	For cultivation, we use metadata for production of cucumbers in passive greenhouses in EU (Clune et al., 2017)
	For secondary packaging, we account for carton boxes and pallet.
	For primary packaging, i.e. plastic film production we use the process from ecoinvent on plastic packaging + electricity for wrapping from literature
	For distibution, we use the ecoinvent process transport, lorry with refrigeration 16 t.
	For retail we account for electricity, and for water used to wet cucumber (only if no packaging is on, so only in S1)
	EoL is based on literature for waste disposal in CH

## Sheet: 2. Data
STAGE	Scenario 1	Scenario 2	Unit		Reference
Cultivation
Starting volume of cucumbers produced	1103.75	1048.22	kg cucumber		Calculated for functional unit of 1000 kg cucumbers sold at retail
Packaging
Primary packaging
Electrical energy (flow packaging)	NA	0.01	kWh		from Girgenti et al. (2014), EU
Packaging film	NA	0.0055	kg/kg cucumber		calculated from retailer (1.93 g of plastic film per 350 g cucumber)
Secondary packaging
Cardboard	0.074	0.074	kg/kg cucumber		Calculated from retailer, CH
Pallet	0.0196	0.0196	kg/kg cucumber		Calculated considering standard weights of pallets, EU, 1,200 mm × 800 mm × 144 mm (47.2 in × 31.5 in × 5.7 in) weighs 25 kg
Transportation from ES to CH
Land distance	1200	1200	km		Webtool https://www.distance.to/, over 18 hours
Retail
Water (spraying/cleaning)	0.01	NA	L/kg cucumber		From retailer, and literature references Vinyes et al. (2017) EU
Electricity	0.294872	0.294872	kW-h
Food waste at retail	9.4	4.6	%		Denkstatt (2017), AT
Volume sold at retail	1000	1000	kg cucumber		FUNCTIONAL UNIT
End of life
Plastic waste
Waste incinerated	NA	100	%		Kawecki et al. (2018), CH
Food waste
Composting	95	95	%		Baier et al. (2016), CH
Incineration	3	3	%		Baier et al. (2016), CH
Landfill	2	2	%		Baier et al. (2016), CH

## Sheet: 3. LCA flows
				Scenario 1	Scenario 2	"Impact factor"	Scenario 1	Scenario 2	Percent contribution			Differences
	Stage	Life cycle inventory dataset	Inventory unit	FU= 1000 kg cucumber sold at Retailer	FU= 1000 kg cucumber sold at Retailer	IPCC 2013:climate change:GWP 100a (kg CO2 eq. / inventory units)	Impact kg CO2 eq.	Impact kg CO2 eq.	% S1	% S2	Contribution of plastic packaging (Fig. 2)	Secnario 2 - Scenario 1
output	Reference product		kg	1000	1000
input	Cultivation	Greenhouse/all/cucumber/Clune et al. (2017)	kg	1103.75	1048.22	2.13	2350.99	2232.7	0.751596	0.743491		-118.289
input	Secondary packaging	corrugated board box//[RER] corrugated board box production	kg	81.6777	77.5681	0.89505	73.1056	69.4273	0.0233714	0.0231193		-3.67827
input		EUR-flat pallet//[RER] EUR-flat pallet production	unit *	0.865342	0.821803	7.09651	6.14091	5.83193	0.00196321	0.00194204		-0.308977
	Retail	electricity, low voltage//[CH] market for electricity, low voltage	kWh	325.466	309.09	0.105905	34.4685	32.7342	0.0110193	0.0109005		-1.73426
		tap water//[CH] market for tap water	kg	11.0375	NA	0.000110726	0.00122214	NA	3.9071e-07	NA		-0.00122214
	Transportation	transport, freight, lorry with refrigeration machine, cooling//[GLO] market for transport, freight, lorry with refrigeration machine, cooling	tonnes*km	1423.55	1358.85	0.461987	657.664	627.77	0.210251	0.209048	0.00120298	-29.8939
output	End-of-life food waste	biowaste//[CH] treatment of biowaste, industrial composting	kg	98.5651	45.8071	0.05027	4.95487	2.30273	0.00158404	0.000766809		-2.65215
output		biowaste//[CH] treatment of biowaste, municipal incineration with fly ash extraction	kg	3.11258	1.44654	0.0320056	0.09962	0.0462974	3.18478e-05	1.5417e-05		-0.0533226
output		biowaste//[RoW] treatment of biowaste, open dump	kg	2.07506	0.964361	0.636661	1.32111	0.613971	0.000422349	0.000204453		-0.707136
input	Primary packaging	packaging film, low density polyethylene//[RER] packaging film production, low density polyethylene	kg	NA	5.7652	2.96614	NA	17.1004	NA	0.00569444	0.00569444	17.1004
input		electricity, low voltage//[CH] market for electricity, low voltage	kWh	NA	10.4822	0.105905	NA	1.11012	NA	0.000369669	0.000369669	1.11012
output	End-of-life plastic waste	waste plastic, mixture//[CH] market for waste plastic, mixture	kg	NA	5.7652	2.34982	NA	13.5472	NA	0.00451121	0.00451121	13.5472
	TOTAL						3128	3003	1	1	0.0117783	-125
					Section 3.1	Net difference	125	kg CO2eq/1000 kg cucumber			Figure 3b
						Impact for 3408 tonnes CO2 (annual volume imported)	426000	kg CO2eq/3408 metric tonnes cucumber			Net gain in CO2 emissions due to plastic waste	31.7577	1
						Social cost of carbon (150 CHF / tonne)	63900	CHF			Net loss in CO2 emissions due to food waste	-157.318	-4.94654
						Equivalent Swiss persons for same impact (considering 4.35 t CO2 per capita per yr)	97.931	Swiss persons
											Impact of 1 cucumber wasted at retail	0.991889	kg CO2/1 cucumber
											Impact of plastic wrapping 1 cucumber*	0.0106039	kg CO2/1 wrap
											1 wrap =	93.5401	wasted cucumbers
												* Assuming that transportation for packaged and unpackaged cucumber is the same

## Sheet: 4. Break-even analysis 
Food waste Scenario 1	Food waste Scenario 2	Environmental impact Scenario 1 (kg CO2-eq/1 tonne cucumber)	Environmental impact Scenario 2 (kg CO2-eq/1 tonne cucumber)	Fig. 4	Food waste reduction due to plastic packaging (%)	Net environmental benefit (kg CO2-eq / 1 tonne cucumber sold)
9.4	9.4	3128.75	3165.56		0	-36.804
9.4	8.3	3128.75	3126.85	Approx Break-even point	1.1	1.9056
9.4	7.4	3128.75	3095.86		2	32.8933
9.4	6.4	3128.75	3062.13		3	66.6253
9.4	5.4	3128.75	3029.11		4	99.6441
9.4	4.6	3128.75	3003.19	Current scenario	4.8	125.561
9.4	4.4	3128.75	2996.78		5	131.972
9.4	3.4	3128.75	2965.12		6	163.631
